1 **Title**

2 Increased brain growth in escaped rainbow trout

3 **Authors**

4 Frédéric Laberge\*, Marie Gutgesell and Kevin S. McCann

5 Department of Integrative Biology, University of Guelph

6

7 \*Correspondence to: F. Laberge, Dept. of Integrative Biology, University of Guelph, 50 Stone Road East,  
8 Guelph, Ontario, Canada, N1G 2W1. Phone: 519-824-4120, ext. 56238; e-mail: [flaberge@uoguelph.ca](mailto:flaberge@uoguelph.ca)

9

10

11 **Abstract**

12 Recent examples of rapid brain size plasticity in response to novel laboratory environments suggest that  
13 fish brain size is a flexible trait, allowing growth or shrinkage of brain tissue based on short term needs.  
14 Nevertheless, it remains to be seen if plasticity of fish brain size is relevant to natural environmental  
15 conditions. Here, using rainbow trout escaped from a farming operation as a natural experiment, we  
16 demonstrate that adult fish brain size can change rapidly in response to life in a natural lake  
17 environment. Specifically, escaped trout had on average 15% heavier brains relative to body size than  
18 captive trout after living for about 7 months in the lake. Because relative brain size of most escaped  
19 trout fell above the range of variation seen within the captive trout population, we conclude that  
20 increased brain size was achieved by plasticity after escape. Brain morphology analysis showed that the  
21 most anterior regions (olfactory bulbs and rest of telencephalon) contributed most to the increase in  
22 overall brain size in escaped trout. Relative size of the heart ventricle, another organ which can be  
23 subject to plastic changes under variable environmental conditions in fish, did not differ between  
24 escaped and captive trout. Massive and selective brain growth under the changed environmental  
25 conditions associated with escape from holding pens highlighted the plastic potential of fish brain size  
26 and suggests that a shift to increased complexity of life in the wild setting of a lake imposed greatly  
27 increased cognitive requirements on escaped trout.

28

29 Keywords: Fish, brain size, brain morphology, heart ventricle size, phenotypic flexibility, phenotypic  
30 plasticity.

31

32

### 33 **Introduction**

34 Living organisms are constantly faced with changing conditions on minute, daily, seasonal to inter-  
35 generational time scales. Scientists have argued that ecosystems are prototypical examples of complex  
36 adaptive systems with organisms capable of rapidly responding to changing conditions in a manner that  
37 fundamentally mediates ecosystem stability and function (Levin, 1998). Following these ideas,  
38 evolutionary ecologists have shown that rapid evolutionary responses can mediate ecosystem stability  
39 (Yoshida et al., 2003) and food webs ecologists have shown that behavioral foraging responses of highly  
40 mobile top predators, if rapid, can also act as potent stabilizers in a noisy world (McCann and Rooney,  
41 2009). It remains unclear if plastic change in physiological systems at a time scale faster than  
42 evolutionary change can act in support of such stabilizing behavioral foraging responses, because  
43 empirical field research on rapid phenotypic flexibility is limited.

44 The ability to reversibly change organ systems to match rapid or predictable change in  
45 environmental conditions within a lifetime, termed phenotypic flexibility by Piersma and Lindström  
46 (1997), has been demonstrated in the digestive system of representative species of all vertebrate groups  
47 [mammals (Hammond et al., 2001), birds (Piersma et al., 1993), reptiles (Naya and Bozinovic, 2006;  
48 Secor, 2008), amphibians (Naya et al., 2009), fish (Armstrong and Bond, 2013; Blier et al., 2007)]. Before  
49 digestion can begin, predatory species rely on a combination of cognitive and locomotor abilities for  
50 prey capture; therefore, matching changes in the nervous and cardiovascular systems with ongoing  
51 foraging conditions through sufficiently rapid phenotypic flexibility would be adaptive. Fish could  
52 maintain a lifelong potential for plasticity of brain size because of widespread adult neurogenesis (Kaslin  
53 et al., 2008) and the modulation of neurogenesis and brain size by sensory experience (Hall and  
54 Tropepe, 2020). Similarly, the ability to display cardiac remodelling in response to experimental  
55 manipulations of temperature (Keen et al., 2017) or exposure to stressors (Johansen et al., 2017;  
56 Simonot and Farrell, 2007) suggests that fish hearts are highly plastic. Such features make fish good  
57 models to assess the extent of phenotypic flexibility associated with changes in foraging demands.  
58 Additionally, comparison of captive and wild fish have shown larger brains (Marchetti and Nevitt, 2003;  
59 Mayer et al., 2011; Park et al., 2012) and heart ventricles (Graham and Farrell, 1992) in wild fish,  
60 suggesting that life in a natural environment puts important demands on both the nervous and  
61 cardiovascular systems, which are met by investment of energy into organ growth and maintenance.  
62 Since laboratory experiments cannot completely capture the richness of experience in a natural  
63 environment, we sought an opportunity for a natural experiment where captive fish would escape from  
64 a floating pen culture operation and forage on wild prey before they were sampled.

65 Escape from pen culture operations happens regularly and escapees usually establish in the local  
66 environment, at least for a short period of time (Charles et al., 2017; Naylor et al., 2005). Patterson and  
67 Blanchfield (2013) obtained about 50% survival of marked or tracked rainbow trout 3 months after  
68 simulated escape from aquaculture pens in Lake Huron, and recaptured trout up to 2.5 years after  
69 release. Most concerns about fish escapes so far have revolved around competition between escaped  
70 fish and the local fauna. Here, we used escape from growing pens as an opportunity to study the effects  
71 of an abrupt transition from captive to natural environmental conditions on fish organ plasticity.  
72 Rainbow trout were sampled approximately 7 months after a large escape event due to a fall storm at a  
73 freshwater aquaculture operation located near a long-term sampling site in Lake Huron, Ontario,  
74 Canada. Because the escape event happened shortly before harvest (trout approx. 1 kg body mass), the  
75 potential effects would be limited to late stages of life. Experimental manipulations entailing

76 environmental enrichment or the transition from a natural environment to captivity have produced  
77 changes in relative brain size in adult fish within a period of three to six weeks (Fong et al., 2019;  
78 Herczeg et al., 2015; Park et al., 2012; Turschwell and White, 2016). This ability supports the hypothesis  
79 that fish maintain the capacity to display phenotypic flexibility of brain size in response to changes in  
80 environmental complexity throughout life. If this hypothesis is true, we can predict that the adult-size  
81 trout that escaped from pens and foraged in a complex natural lake environment would show an  
82 increase in relative brain size compared to trout directly sampled from growing pens. Similarly,  
83 increased swimming demands are likely associated with life in a large lake compared to the restricted  
84 space available in captivity, which should promote a heart ventricle phenotype adapted for better  
85 swimming performance like the larger ventricles seen in wild rainbow trout (Graham and Farrell, 1992).  
86 Thus, we also predicted that escaped trout would have larger heart ventricles compared to trout  
87 sampled from growing pens to meet increased swimming demands in the lake environment.

88

## 89 **Materials and Methods**

### 90 Study system

91 Escaped trout were collected in Parry Sound, Ontario, Canada. Parry Sound is a large body of water  
92 (about 12 × 10 km) connected to Lake Huron's Georgian Bay by a shallow channel approximately 6 km  
93 long, creating a natural barrier to fish population movements. A commercial rainbow trout pen culture  
94 operation is located in the southernmost part of Parry Sound in Depot Harbour (Figure 1A). Although  
95 self-reproducing populations of rainbow trout and chinook salmon are found in Georgian Bay and some  
96 of its tributaries (Dobiesz et al., 2005; Johnson et al., 2010), Parry Sound is distinguished by the exclusive  
97 presence of a lake trout population as the top pelagic fish predator (Reid et al., 2001). Lake trout (1981-  
98 1997) and rainbow trout (1986-1994) were stocked in Parry sound to subsidize sport fishing (Reid et al.,  
99 2001); however, while lake trout achieved successful reintroduction criteria in Parry sound by 1997 and  
100 remain abundant (Trumpickas et al., 2020), rainbow trout have not been stocked since 1994 and there is  
101 no evidence of natural reproduction of this species in this area.

### 102 Sampling and preparation

103 Escaped trout were sampled in the last week of May 2019 (n=26) using angling and gill nets. The fish  
104 were sacrificed by a light stunning blow followed by neck puncture to section the spinal cord caudal to  
105 the brain. Escape was due to a 2018 fall storm that damaged growing pens and led to the escape of tens  
106 of thousands of fish into the lake. A baseline for comparison with escapees relied on sampling of captive  
107 trout directly from growing pens in 2019 as well as in prior years (2015-2017), part of a study of  
108 resource subsidies of the farming operation into the Parry Sound food web (Johnson et al., 2018). The  
109 use of fish sampled over multiple years was needed to establish a reliable baseline of captive fish.  
110 Captive fish were collected in June-August 2015-17 (n=5-9 per year), May 2019 (n=10) and early  
111 September 2019 (n=6). The September 2019 fish were needed because the only captive trout available  
112 in May 2019 were unusually small (mean and range fork length 276 [237-309] mm compared to 417  
113 [357-555] mm in other years). Most captive fish were taken directly from growing pens using dip nets  
114 and sacrificed as described above, but the September 2019 collection slightly differed in that the fish  
115 taken from the growing pens were transported in iced water to a processing plant before they were  
116 obtained for tissue sampling and preparation. Baseline organisms (mayfly larvae, snails, zebra mussels)

117 and feed (2.5mm, 4mm, 5mm, 6mm, and 7.5mm Premium Trout FW pellets, Skretting Inc.) were  
118 obtained in May 2019 and summer 2018, respectively. Sampling procedures were approved by the  
119 Ontario Ministry of Natural Resources (permits UGLMU2016-06, UGLMU2016-05, UGLMU2017-05 and  
120 UGLMU2019-04) and the University of Guelph animal care committee (protocols 3155 and 3563).

121 Fish were processed daily on shore (or in the lab for the September 2019 captive fish). This  
122 involved taking a photograph of the whole fish, weighing body mass to the nearest 0.01 kg with a Rapala  
123 Pro Select digital scale, and measuring fork length to the nearest 1 mm on a measuring board. Fish body  
124 cavities were opened to examine gonads, obtain a liver tissue sample and remove the heart. A sample  
125 was then taken from the dorsal caudal musculature (skin cut out). Remaining skin (including scales) from  
126 both sides was separated from muscle using a filleting knife. Then, the top half of the head was  
127 dissected, and the base of the braincase exposed and cut gently to allow access to the otoliths. Fine  
128 tweezers were used to remove the otoliths without damaging the brain. All samples of liver, muscle, skin  
129 and otoliths were frozen at -20 °C immediately and kept frozen until processing for stable isotope  
130 analysis (see below). The top half of the head and the heart were immersed in fixative (10% buffered  
131 formalin) and remained in this solution until further dissection, which happened every year within a  
132 maximum of 8 months after collection. Yearly weighing of the same brain and heart ventricle samples  
133 (n=12) at different intervals showed an average 3.5%, 4.7%, and 29% decrease in mass after 1.5, 2.5 and  
134 3.5 years in formalin storage, respectively, suggesting minimal decrease in the few months of storage  
135 that preceded data acquisition. Brains were dissected out of the fixed heads, trimmed of excess cranial  
136 nerves, and the spinal cord was cut at the level of the obex. Brains were then blotted using Kimwipes  
137 (Kimberly-Clark) to remove excess formalin before weighing using an analytical balance (Accu-124D  
138 Fisher Scientific) at a resolution of 0.0001 g. Heart ventricles were trimmed of surrounding tissue before  
139 blotting and weighing in the same manner. The relationships between fish body weight and organ  
140 weights were thus between 'wet' body weight and 'post-fixation' organ weights.

141 Brain and heart ventricle morphology were also assessed to determine if these parameters were  
142 influenced by escape. Assessment of brain morphology was based on Edmunds et al. (2016). Briefly, the  
143 volumes of five brain regions (olfactory bulbs, rest of telencephalon, optic tectum, cerebellum,  
144 hypothalamus) were estimated using the ellipsoid method:  $Volume = \pi/6 (Length \times Width \times Height)$   
145 (White and Brown, 2015). Digital images of the dorsal, ventral and left sides of the brain were taken  
146 through an Olympus SZ61 dissection microscope using a Cannon Powershot G9 digital camera and  
147 PSREMOTE v.1.7 software. The linear length, width, and height of brain regions were measured using  
148 the straight line measuring tool in Fiji ImageJ (Schindelin et al., 2012). Only the left side of the brain was  
149 photographed by assuming that the height of both sides of bilaterally symmetrical brain regions was the  
150 same. Heart ventricle shape was assessed because an elongated heart ventricle characterizes wild trout  
151 (Poppe et al., 2003) and is a phenotype associated with better swimming performance (Claireaux et al.,  
152 2005). Digital callipers (Mastercraft) were used to measure maximal length and width of the fixed heart  
153 ventricles to the nearest 0.1 mm to obtain a basic measure of shape, the length to width ratio. Length  
154 was obtained between the side where bulbus arteriosus and atrium are attached to the ventricle and  
155 the posteriorly oriented tip of the pyramid-shaped ventricle. Width was obtained at a right angle to the  
156 length measurement between the dorsal and ventral, or lateral, ventricular surfaces, whichever was  
157 widest.

158 Isotope analysis

159 Stable isotope ratios of carbon and nitrogen were measured to infer differential resource use between  
160 escaped and captive trout (Vander Zanden and Rasmussen, 1999). Tissues with different molecular  
161 turnover rates were analyzed as we only expected divergence in isotopic signatures in tissues recently  
162 turned over (liver fastest followed by muscle) between escaped and captive trout based on differential  
163 consumption of wild prey and trout feed. Common isotopic signatures between escaped and captive  
164 trout in tissues with low turnover rates (scales and otoliths) would support feeding on a common  
165 resource (trout feed) prior to escape. In preparation for stable isotope analysis, fish liver and muscle  
166 samples, baseline organisms and feed were dried at 70 °C for 2 days and ground into a fine powder.  
167 Scales were obtained by scraping thawed skins with a scalpel and then collected into a glass vial before  
168 drying overnight at 70 °C. Scales and otoliths were not processed further before submission for analysis  
169 of stable isotope contents. Tissue samples were sent to the University of Windsor GLIER Chemical  
170 Tracers Lab for isotopic analysis (Windsor, ON, Canada).

### 171 Fin erosion

172 Assessment of fin erosion between rainbow trout and a wild salmonid of Parry Sound (lake trout  
173 *Salvelinus namaycush*) was also used as supporting evidence of the escape of rainbow trout from pens.  
174 Captive fish housed at high density show a high incidence of fin erosion (Person-Le Ruyet et al., 2007;  
175 Petersson et al., 2013). We compared damage to the caudal fins on photographs of rainbow trout and  
176 lake trout sampled in Parry Sound using available photographs of lake trout sampled for purposes other  
177 than the present study (e.g. Johnson et al., 2018). A scale of caudal fin damage adapted from Petersson  
178 et al. (2013) was established with the lower erosion level 1 (little to no erosion) what is typically seen in  
179 wild fish, intermediate erosion level 2 (clear erosion on less than 50% of the fin), and advanced erosion  
180 level 3 (fin more than 50% eroded) (Figure 1B).

### 181 Statistics

182 Stable isotope data were submitted to a mixed-effect modeling analysis in Prism 8 (GraphPad Software,  
183 San Diego, CA), with tissue (liver, muscle, scales, otoliths) and source (captive, escaped) as fixed effects  
184 and individual fish as a random effect. Sidak's multiple comparison test was used to assess the effect of  
185 source on each tissue. Analysis of covariance (ANCOVA) computed in SPSS Statistics 26 (IBM, Armonk,  
186 NY) was used to compare the relative size of brain and heart ventricle between captive and escaped  
187 trout. The same method was used for comparisons of relative brain size of trout captured by different  
188 methods or captured at different sites. Multivariate analysis of covariance (MANCOVA) in SPSS was used  
189 to evaluate the contribution of different regions to brain size differences between captive and escaped  
190 trout. Only trout in which all five brain regions could be measured accurately were included in this  
191 analysis. For both ANCOVA and MANCOVA, the body size variable was set as a covariate and all mass  
192 and length data were Log<sub>10</sub> transformed to meet test assumptions.

193

## 194 **Results**

### 195 Evidence supporting escape from pens

196 Multiple lines of evidence support that the rainbow trout sampled in Parry Sound escaped from the pen  
197 culture operation shortly before harvest in fall 2018. First, all rainbow trout sampled outside growing  
198 pens were larger or close to market size (approx. 1 kg body mass), the size at which trout are reported

199 to have escaped from growing pens (G. Cole, personal communication). Second, all rainbow trout caught  
200 were females, in line with the routine aquaculture practice of treating young fish to create monosexual  
201 growing stocks (Benfey, 1996). Third, our analysis of fin erosion showed that 75% of rainbow trout  
202 sampled in Parry Sound had intermediate or advanced fin erosion, a proportion similar to rainbow trout  
203 of similar size sampled directly from the pens (67%). Conversely, none of the 15 wild lake trout sampled  
204 in Parry Sound for which we have pictures available showed such fin damage. Fourth, no rainbow trout  
205 were captured during our fish sampling survey of Parry Sound in summer 2018 prior to the escape  
206 event, confirming the normal absence of this species from Parry Sound without input from the pen  
207 culture operation. Finally, we compared escaped and captive trout stable isotope signatures of carbon  
208 and nitrogen in tissues differing in molecular turnover rates in the fish sampled in 2019 (Figure 2).  
209 Results showed that liver  $\delta^{13}\text{C}$  signatures significantly differed between captive and escaped trout  
210 (Tissue\*Source:  $F_{(3, 88)} = 3.5$ ,  $p = 0.02$ ; pen vs. escaped:  $P > 0.4$  for otoliths, scales and muscle,  $P < 0.0001$   
211 for liver), with escaped trout showing more negative  $\delta^{13}\text{C}$  values suggesting an increased reliance on  
212 offshore food resources by the escaped trout (Vander Zanden and Rasmussen, 1999). Liver was the  
213 tissue with the fastest molecular turnover rate that we studied (Busst and Britton, 2018; Logan et al.,  
214 2006; MacNeil et al., 2006). The lack of difference in isotopic signatures in slower turnover tissues  
215 (muscle, scales and otoliths < liver) supports the common use of resources by all fish prior to escape (i.e.  
216 commercial fish feed). A lack of difference in liver  $\delta^{15}\text{N}$  signatures is likely due to comparable  $^{15}\text{N}$  content  
217 of fish feed and wild prey available to the escaped trout, which is supported by a comparison of  $\delta^{15}\text{N}$  in  
218 baseline organisms sampled from Parry Sound and commercial fish feed (Figure S1). The multiple lines  
219 of evidence presented above support our contention that rainbow trout sampled in the waters of Parry  
220 Sound had escaped from growing pens about 7 months prior to capture. The probability that some of  
221 the rainbow trout sampled in Parry Sound were strays from a nearby wild population is extremely low.

222

### 223 Brain size

224 We compared body size-brain size relationships of escaped trout and trout sampled directly from  
225 growing pens to test the prediction stating that increased complexity of life in a natural lake  
226 environment would increase brain size in escaped trout. Only trout above 330 mm fork length and 0.5 kg  
227 body mass were included in this analysis to ensure that the groups were within comparable size ranges.  
228 A preliminary analysis showed no difference in relative brain size of captive trout sampled in different  
229 years, so captive fish of different years were used as baseline for comparison with escaped trout. Figure  
230 3A shows that brains of escaped trout are about 15% heavier on average than brains of fish captured  
231 directly from growing pens after accounting for body size. Importantly, relative brain size of most  
232 escaped trout fell above the range of variation seen within the captive trout sample, supporting a  
233 mechanism of brain size plasticity for the observed increase instead of selection against escaped trout  
234 with smaller brains. ANCOVA showed that the difference in brain size is statistically significant whether  
235 correction for body size is based on body mass (LogBodyMass:  $F_1 = 166.5$ ,  $P < 0.001$ ,  $\eta_p^2 = 0.77$ ; escaped  
236 vs. captive:  $F_1 = 37.0$ ,  $P < 0.001$ ,  $\eta_p^2 = 0.43$ ) or fork length (LogForkLength:  $F_1 = 218.4$ ,  $P < 0.001$ ,  $\eta_p^2 =$   
237  $0.82$ ; escaped vs. captive:  $F_1 = 7.8$ ,  $P = 0.007$ ,  $\eta_p^2 = 0.14$ ). Inclusion of smaller captive trout collected in  
238 May 2019 in a supplementary analysis yielded similar results (LogBodyMass:  $F_1 = 265.5$ ,  $P < 0.001$ ,  $\eta_p^2 =$   
239  $0.81$ ; escaped vs. captive:  $F_1 = 31.4$ ,  $P < 0.001$ ,  $\eta_p^2 = 0.34$ ), but these fish are excluded from Figure 3 for  
240 clarity.

241 Since previous research established that larger brains relative to body size can facilitate the  
242 colonization of novel environments in birds and mammals (Fristoe et al., 2017; Sol et al., 2005; 2008),  
243 we were also interested in comparing brain size of escaped trout that moved away from the pen culture  
244 operation to those that remained in its vicinity. Even though we cannot ascertain the movements of  
245 trout during the 7 months following escape, local angling activity for escaped rainbow trout suggest that  
246 many fish remain in the vicinity of pens for an extended period. Therefore, capture at a great distance  
247 from the pens is at least an indicator that these fish dispersed away from the site of their escape and did  
248 not return near the pens daily. Figure 3B shows that trout captured in the northern part of Parry Sound  
249 in 2019, about 10 km due north from the pen culture operation, have larger brains than escaped trout  
250 captured near the pen culture operation. ANCOVA showed that this difference was on the statistical  
251 threshold (capture site:  $F_1 = 4.3$ ,  $P = 0.05$ ,  $\eta_p^2 = 0.16$ ) even though only 7 trout could be captured far  
252 away from the growing pens. This observation could support the notion that trout with the largest  
253 relative brain sizes were better suited to disperse in novel environments. This difference in brain size  
254 does not appear related to differences in foraging because liver stable isotope signatures do not differ  
255 between capture sites (Figure S2). It is also interesting to note that there is no relationship between  
256 relative brain size and liver stable isotope signatures among escaped trout (Figure S3A-B), suggesting no  
257 difference in diet based on brain size in escaped fish. Informal observation of stomach contents of the  
258 escaped trout captured in 2019 identified recently consumed prey as mostly littoral benthic  
259 macroinvertebrates (dragonfly and caddisfly larvae) and occasional forage fish.

260 Finally, we compared brain size of escaped trout captured by angling ( $n=10$ ) and gill netting  
261 ( $n=16$ ) to verify if angling pressure selectively removing smaller brained escaped trout could introduce a  
262 population bias contributing to the larger brains of escaped trout. ANCOVA showed no clear significant  
263 difference in brain size with capture method ( $F_1 = 3.1$ ,  $P = 0.09$ ). The trend was for larger brains in trout  
264 captured by angling compared to trout captured by netting (ANCOVA EMM [95% CI]: angling, 0.62 [0.59-  
265 0.64]; netting, 0.58 [0.56-0.61]), which is opposite to how an angling bias could produce larger brains in  
266 the population of escaped trout.

267

#### 268 Brain region sizes

269 The size of five brain regions was measured to evaluate their contribution to the larger brain size  
270 observed in escaped trout. Figure 4 shows that the telencephalic brain regions located anteriorly  
271 (olfactory bulbs and rest of telencephalon) are generally larger in escaped trout. The relative sizes of the  
272 other brain regions overlap greatly between captive and escaped trout. MANOVA highlighted a  
273 statistically significant difference in region size between groups (LogBodyMass:  $F_{5,34} = 8.6$ ,  $P < 0.001$ ,  $\eta_p^2$   
274  $= 0.56$ ; escaped vs. captive:  $F_{5,34} = 9.5$ ,  $P < 0.001$ ,  $\eta_p^2 = 0.58$ ). Follow-up univariate tests for each region  
275 showed that only the olfactory bulbs ( $F_{1,38} = 15.7$ ,  $P < 0.001$ ,  $\eta_p^2 = 0.29$ ) and telencephalon ( $F_{1,38} = 36.3$ ,  $P$   
276  $< 0.001$ ,  $\eta_p^2 = 0.49$ ) of escaped trout were larger compared to captive trout (about 36% and 40% larger,  
277 respectively). The other brain regions did not differ in size between groups (tectum:  $F_{1,38} = 2.2$ ,  $P = 0.15$ ,  
278 cerebellum:  $F_{1,38} = 0.04$ ,  $P = 0.85$ , hypothalamus:  $F_{1,38} = 2.4$ ,  $P = 0.13$ ).

279

#### 280 Heart ventricle size



281 To test our prediction that plastic changes for larger ventricles would be induced by the enhanced  
282 swimming requirements associated with life in a natural lake environment, we compared the heart  
283 ventricle size of escaped and captive trout. Preliminary analysis showed no difference in relative  
284 ventricle size of captive trout sampled in different years, but a more elongated ventricle shape of  
285 captive fish sampled in 2017 compared to other years. Therefore, we limited our analysis to relative  
286 heart size because year to year differences in early life conditions could have determined ventricle  
287 shape of the escaped trout (e.g. temperature differences: Dimitriadi et al., 2021). Figure 3C shows that  
288 the relationships between body mass and ventricle mass overlap greatly in escaped and captive trout.  
289 This observation is supported by a non-significant effect of escape on ventricle mass (LogBodyMass:  $F_1 =$   
290  $250.2$ ,  $P < 0.001$ ,  $\eta_p^2 = 0.84$ ; escaped vs. captive:  $F_1 = 2.7$ ,  $P = 0.11$ ). Thus, escape into the lake did not  
291 select for or induce the growth of larger heart ventricles.

292

## 293 Discussion

294 While researchers have begun to recognize the plasticity of adult fish brain size from lab experiments,  
295 we used escaped aquaculture-raised rainbow trout to show the rapid change brain size can undergo  
296 when adult fish are newly exposed to a natural environment. Phenotypic flexibility of brain size is the  
297 best explanation for the observed difference between captive and escaped trout. As alternative  
298 explanations, the selective escape of large-brained trout can be ruled out because fall storms resulted in  
299 massive escape of tens of thousands of fish from broken pens without recovery. Secondly, selective  
300 removal of small-brained trout by angling can be rejected because angling capture showed no bias for  
301 small-brained trout. Finally, selective mortality of small-brained trout following escape is not supported  
302 by the data because relative brain size of most escaped trout was above the range of variation seen  
303 within the sample of captive trout. Escaped fish partitioned themselves into those that stayed near the  
304 aquaculture pens and those that moved away a long distance. Intriguingly, those that moved away had  
305 larger brains, possibly because they showed an even stronger increase in brain size in response to their  
306 novel wild environment, or because their larger brains promoted colonization of novel habitats (Fristoe  
307 et al., 2017; Sol et al., 2005; 2008). As rainbow trout went from a predictable schedule of pelleted feed  
308 in a simple, constrained floating pen environment to an expansive natural foraging arena where prey  
309 items were heterogeneous and evasive, we also expected rapid changes in the heart to aid with altered  
310 demands on locomotion. However, we found no difference in relative heart ventricle size between  
311 captive and escaped trout that would suggest differences in locomotion. Nevertheless, we found that  
312 stable isotope signatures in a fast turnover tissue of escaped trout showed a significant shift indicative  
313 of changing foraging conditions for increased open water feeding in escaped trout.

### 314 Phenotypic flexibility of trout brain size

315 Our results contribute to mounting evidence showing that brain size in adult fish can be subject to  
316 phenotypic flexibility (see also Fong et al., 2019; Herczeg et al., 2015; Park et al., 2012; Turschwell and  
317 White, 2016). Flexibility of brain size would likely modulate cognitive capacity according to  
318 environmental complexity or foraging requirements, although the specific benefits of larger brains will  
319 require further investigation. Reducing brain size in a timely fashion is also likely advantageous in order  
320 to save resources for periods of high activity because nervous tissue is among the most energetically  
321 costly to maintain (Mink et al., 1981).

322 Flexibility of brain size associated with changing environmental conditions during lifetime is  
323 potentially widespread in organisms that maintain a high capacity for adult brain neurogenesis and  
324 lifelong brain growth, such as most anamniote and non-avian reptile vertebrates (Kaslin et al., 2008).  
325 Nonetheless, short-lived mammals living under constant high energy demands show seasonal cycles in  
326 skull and brain size that appear to match seasonal activity patterns (LaPoint et al., 2017; Lázaro et al.,  
327 2018; 2019). Further, seasonal and activity-dependent changes in regional size of the mammalian  
328 hippocampus and avian song control nuclei have been noted (Clayton and Krebs, 1994; Jacobs, 1996;  
329 Nottebohm, 1981; Tramontin and Brenowitz, 2000; Yaskin, 2011). These brain regions are characterized  
330 by abundant adult neurogenesis even though birds and mammals display overall determinate brain  
331 growth (Amrein et al., 2011; Goldman and Nottebohm, 1983). This suggests that the potential for  
332 phenotypic flexibility of brain size is not limited to basal vertebrates but is possibly limited to brain  
333 regions with high neurogenic potential. Despite the latter, differences in neurogenic potential across  
334 brain regions are unlikely to explain our finding that anterior telencephalic brain regions contributed  
335 most to the change in brain size observed in escaped trout because the brain region with the highest  
336 proliferative activity in teleosts appears to be the cerebellum (Zupanc and Horschke, 1995). Greater  
337 growth of telencephalic regions in escaped trout might be activity-dependent and reflect specific  
338 requirements of foraging involving olfactory and spatial processing, functions associated with the  
339 olfactory bulbs and dorsal telencephalon (Kotrschal et al., 1998; Rodríguez et al., 2002).

#### 340 Implications for studies of brain size evolution

341 The evolution of brain size has long attracted the interest of scientists (see Jerison, 1973). In studies of  
342 brain size evolution among taxa, researchers commonly use as little as one specimen to represent the  
343 'typical' brain size of a given species (e.g. Clutton-Brock and Harvey, 1980; Garamszegi et al., 2002;  
344 Gonzalez-Voyer et al., 2009). Considering that brain size in many vertebrates may be subject to  
345 phenotypic flexibility, rapid plastic change within a lifetime could introduce important uncertainty in the  
346 ability to estimate brain size for a given species based on sampling conditions. We know little about the  
347 magnitude of plastic changes in brain size relative to differences that have evolved between species  
348 over evolutionary time, which could have an important impact on the evaluation of evolutionary  
349 patterns, especially at lower taxonomic levels. The average brain size difference between escaped and  
350 captive trout measured here provides an estimate of 15% in potential plastic change for this species.  
351 This means that using captive rainbow trout to establish the 'typical' brain size of this species would  
352 underestimate normal brain size by a substantial amount. Thus, establishing a species reaction norm of  
353 brain size should be considered, when possible, by estimating seasonal (e.g. McCallum et al., 2014),  
354 habitat (e.g. Axelrod et al., 2018) or other kinds of variation in relative brain size within a species and by  
355 factoring the captive or wild status of specimens. This variance around average brain size data could  
356 then be included in models of brain size evolution for more accurate evaluation of evolutionary patterns  
357 and their associated uncertainty.

#### 358 Relevance of organ phenotypic flexibility to fish-driven ecological dynamics

359 Evolutionary ecologists have long pushed the notion that rapid evolutionary responses have the  
360 potential to be major drivers of ecological dynamics (Hairston Jr et al., 2005; Thompson, 1998); a view  
361 that was later supported by experimental evidence (Yoshida et al., 2003). Despite this evidence, much of  
362 ecology research still ignores evolutionary dynamics as though they are too slow to significantly impact  
363 population dynamics (discussed in Endler, 1991; Thompson, 1998), perhaps because overall evidence

364 from wild systems remains sparse (although see Turcotte et al., 2011). Here, we go beyond this growing  
365 literature by showing that a complex physiological structure (brain) can change on infra-evolutionary  
366 timescales in the wild. The role for brain size in fish cognitive capacity (Buechel et al., 2018) imply that  
367 change in this structure, or its trait distribution, can influence fish foraging capacity at the population  
368 level, which is a main determinant of fish effects on aquatic population dynamics. Plastic change in brain  
369 size has the potential to influence ecological dynamics directly or by interaction with heritable change  
370 (see Ellner et al., 2011). Therefore, top-down ecological dynamics in aquatic systems can be subject to  
371 drives at different time scales, from recurring periods in an individual lifetime to more or less rapid  
372 generational effects. The factors that determine which temporal drivers dominate under different  
373 conditions should prove fertile ground for future research.

#### 374 Can phenotypic flexibility contribute to ecosystem stability?

375 Ecologists have recently made arguments that higher order mobile predators can play major roles in  
376 mediating the stability of whole ecosystems if they can respond in a rapid and informed manner to  
377 spatial and temporal prey variation. Specifically, researchers have argued that if prey vary in multiple  
378 habitats non-synchronously then informed mobile predators can average across this variation like a  
379 stock market broker uses the “portfolio effect” across non-synchronous stocks to smooth variation over  
380 time and space providing stability in returns (McCann and Rooney, 2009; Schindler et al., 2015).  
381 Nonetheless, this mechanism requires that mobile organisms be capable of making rapid informed  
382 decisions, as delays in adaptive response to changing prey can drive significant instability (Abrams,  
383 1992). Our results show that fish in the wild can indeed rapidly respond to novel environments by  
384 growing larger brains (15% growth) within a period of about 7 months. Therefore, it appears that fish  
385 have the physiological machinery to alter the ability to make informed decisions, as general theory for  
386 stability requires (e.g. McCann and Rooney, 2009), at a time scale faster than evolutionary mechanisms  
387 can provide. Thus, ecosystem stability mechanisms could also depend on cycles of energy budget  
388 management in long-lived predators (organ growth and shrinkage) that help smooth variance in cycles  
389 of population abundance over time. It remains to be seen if phenotypic flexibility of organs that  
390 contribute to foraging performance is a pronounced characteristic of mobile predators or a more  
391 widespread physiological phenomenon.

392

#### 393 **Acknowledgements**

394 We gratefully acknowledge Gord Cole and Kana Upton of Aqua Cage Fisheries and Cole-Munro (St-  
395 Thomas) who supplied us with farmed trout. James Simpson provided invaluable help in the field and  
396 Elizabeth Thurston helped in the laboratory. The Natural Sciences and Engineering Research Council of  
397 Canada Discovery Grant program (Laberge, McCann) and the Canada First Research Excellence Fund  
398 (McCann) provided financial support.

399

## 400 References

- 401 Abrams, P.A. (1992). Adaptive foraging by predators as a cause of predator-prey cycles. *Evol. Ecol.* **6**, 56–  
402 72.
- 403 Amrein, I., Isler, K. and Lipp, H.P. (2011). Comparing adult hippocampal neurogenesis in mammalian  
404 species and orders: influence of chronological age and life history stage. *Eur. J. Neurosci.* **34**, 978–  
405 987.
- 406 Armstrong, J.B. and Bond, M.H. (2013). Phenotype flexibility in wild fish: Dolly Varden regulate  
407 assimilative capacity to capitalize on annual pulsed subsidies. *J. Anim. Ecol.* **82**, 966–975.
- 408 Axelrod, C.J., Laberge, F. and Robinson, B.W. (2018). Intraspecific brain size variation between coexisting  
409 sunfish ecotypes. *Proc. R. Soc. B* **285**, 20181971.
- 410 Benfey, T.J. (1996). Use of all-female and triploid salmonids for aquaculture in Canada. *Bull. Aquacult.*  
411 *Assoc. Canada* **96-2**, 6–8.
- 412 Buechel, S.D., Boussard, A., Kotrschal, A., van der Bijl, W. and Kolm, N. (2018). Brain size affects  
413 performance in a reversal-learning test. *Proc. R. Soc. B* **285**, 20172031.
- 414 Blier, P.U., Dutil, J.-D., Lemieux, H., Bélanger, F. and Bitetera, L. (2007). Phenotypic flexibility of digestive  
415 system in Atlantic cod (*Gadus morhua*). *Comp. Biochem. Physiol.* **146A**, 174–179.
- 416 Busst, G.M.A. and Britton, J.R. (2018). Tissue-specific turnover rates of the nitrogen stable isotope as  
417 functions of time and growth in a cyprinid fish. *Hydrobiologia* **805**, 49–60.
- 418 Charles, C., Blanchfield, P.J. and Gillis, D.M. (2017). Site fidelity of escaped rainbow trout to an  
419 experimental freshwater aquaculture facility and habitat overlap with native fish fauna. *Aquacult.*  
420 *Environ. Interact.* **9**, 415–428.
- 421 Claireaux, G., McKenzie, D.J., Genge, A.G., Chatelier, A., Aubin, J. and Farrell, A.P. (2005). Linking  
422 swimming performance, cardiac pumping ability and cardiac anatomy in rainbow trout. *J. Exp. Biol.*  
423 **208**, 1775–1784.
- 424 Clayton, N.S. and Krebs, J.R. (1994). Hippocampal growth and attrition in birds affected by experience.  
425 *Proc. Natl. Acad. Sci. USA* **91**, 7410–7414.
- 426 Clutton-Brock, T.H. and Harvey, P.H. (1980). Primates, brains and ecology. *J. Zool.* **190**, 309–323.
- 427 Dimitriadi, A., Geladakis, G. and Koumoundouros, G. (2021). 3D heart morphological changes in  
428 response to developmental temperature in zebrafish: More than ventricle roundness. *J. Morphol.*  
429 **282**, 80–87.
- 430 Dobiesz, N.E., McLeish, D.A., Eshenroder, R.L., Bence, J.R., Mohr, L.C., Ebener, M.P., Nalepa, T.F., Woldt,  
431 A.P., Johnson, J.E., Argyle, R.L. and Makarewicz, J.C. (2005). Ecology of the Lake Huron fish  
432 community, 1970-1999. *Can. J. Fish. Aquat. Sci.* **62**, 1432–1451.
- 433 Edmunds, N.B., McCann, K.S. and Laberge, F. (2016). Food web structure shapes the morphology of  
434 teleost fish brains. *Brain Behav. Evol.* **87**, 128–138.

- 435 Endler, J.A. (1991). "Genetic heterogeneity and ecology" in Genes in Ecology: The 33rd Symposium of  
436 the British Ecological Society, R.J. Berry, T.J. Crawford, G.M. Hewitt, Eds. (Blackwell Scientific  
437 Publications), pp. 315–334.
- 438 Ellner, S.P., Geber, M.A. and Hairston Jr, N.G. (2011). Does rapid evolution matter? Measuring the rate  
439 of contemporary evolution and its impacts on ecological dynamics. *Ecol. Lett.* **14**, 603–614.
- 440 Fong, S., Buechel, S.D., Boussard, A., Kotrschal, A. and Kolm, N. (2019). Plastic changes in brain  
441 morphology in relation to learning and environmental enrichment in the guppy (*Poecilia reticulata*). *J.*  
442 *Exp. Biol.* **222**, jeb200402.
- 443 Fristoe, T.S., Iwaniuk, A.N. and Botero, C.A. (2017). Big brains stabilize populations and facilitate  
444 colonization of variable habitats in birds. *Nat. Ecol. Evol.* **1**, 1706–1715.
- 445 Garamszegi, L.Z., Møller, A.P. and Erritzøe, J. (2002). Coevolving avian eye size and brain size in relation  
446 to prey capture and nocturnality. *Proc. R. Soc. B* **269**, 961–967.
- 447 Goldman, S.A. and Nottebohm, F. (1983). Neuronal production, migration, and differentiation in a vocal  
448 control nucleus of the adult female canary brain. *Proc. Natl. Acad. Sci. USA* **80**, 2390–2394.
- 449 Gonzalez-Voyer, A., Winberg, S. and Kolm, N. (2009). Brain structure evolution in a basal vertebrate  
450 clade: evidence from phylogenetic comparative analysis of cichlid fishes. *BMC Evol. Biol.* **9**, 238.
- 451 Goolish, E.M. (1987). Cold-acclimation increases the ventricle size of carp, *Cyprinus carpio*. *J. Therm. Biol.*  
452 **12**, 203–205.
- 453 Graham, M.S. and Farrell, A.P. (1992). Environmental influences on cardiovascular variables in rainbow  
454 trout, *Oncorhynchus mykiss* (Walbaum). *J. Fish Biol.* **41**, 851–858.
- 455 Hall, Z.J. and Tropepe, V. (2020). Using teleost fish to discern developmental signatures of evolutionary  
456 adaptation from phenotypic plasticity in brain structure. *Front. Neuroanat.* **14**, 10.
- 457 Hairston Jr, N.G., Ellner, S.P., Geber, M.A., Yoshida, T. and Fox, J.A. (2005). Rapid evolution and the  
458 convergence of ecological and evolutionary time. *Ecol. Lett.* **8**, 1114–1127.
- 459 Hammond, K.A., Szewczak, J. and Król, E. (2001). Effects of altitude and temperature on organ  
460 phenotypic plasticity along an altitudinal gradient. *J. Exp. Biol.* **204**, 1991–2000.
- 461 Herczeg, G., Gonda, A., Balázs, G., Noreikiene, K. and Merilä, J. (2015). Experimental evidence for sex-  
462 specific plasticity in adult brain. *Front. Zool.* **12**, 38.
- 463 Jacobs, L.F. (1996). The economy of winter: phenotypic plasticity in behavior and brain structure. *Biol.*  
464 *Bull.* **191**, 92–100.
- 465 Jerison, H.J. (1973). Evolution of the brain and intelligence, Academic Press.
- 466 Johansen, I.B., Sandblom, E., Skov, P.V., Gräns, A., Ekström, A., Lunde, I.G., Vindas, M.A., Zhang, L.,  
467 Höglund, E., Frisk, M., Sjaastad, I., Nilsson, G.E. and Øverli, Ø. (2017). Bigger is not better: cortisol-  
468 induced cardiac growth and dysfunction in salmonids. *J. Exp. Biol.* **220**, 2545–2553.

- 469 Johnson, J.E., DeWitt, S.P. and Gonder, D.J.A. (2010) Mass-marking reveals emerging self regulation of  
470 the Chinook salmon population in Lake Huron. *N. Am. J. Fish. Manage.* **30**, 518–529.
- 471 Johnson, L.E., McMeans, B., Rooney, N., Gutgesell, M., Moccia, R. and McCann, K.S. (2018). Asymmetric  
472 assimilation of an anthropogenic resource subsidy in a freshwater food web. *Food Webs* **15**, e00084.
- 473 Kaslin, J., Ganz, J. and Brand, M. (2008). Proliferation, neurogenesis and regeneration in the non-  
474 mammalian vertebrate brain. *Phil. Trans. R. Soc. B* **363**, 101–122.
- 475 Keen, A.N., Klaiman, J.M., Shiels, H.A. and Gillis, T.E. (2017). Temperature-induced cardiac remodelling in  
476 fish. *J. Exp. Biol.* **220**, 147–160.
- 477 Klaiman, J.M., Fenna, A.J., Shiels, H.A., Macri, J. and Gillis, T.E. (2011). Cardiac remodeling in fish:  
478 strategies to maintain heart function during temperature change. *PLOS One* **6**, e24464.
- 479 Kotrschal, K., van Staaden, M.J. and Huber, R. (1998). Fish brains: evolution and environmental  
480 relationships. *Rev. Fish Biol. Fish.* **8**, 373–408.
- 481 LaPoint, S., Keicher, L., Wikelski, M., Zub, K. and Dechmann, D.K.N. (2017). Growth overshoot and  
482 seasonal size changes in the skulls of two weasel species. *R. Soc. Open Sci.* **4**, 160947.
- 483 Lázaro, J., Hertel, M., LaPoint, S., Wikelski, M., Stiehler, M. and Dechmann, D.K.N. (2018). Cognitive skills  
484 of common shrews (*Sorex araneus*) vary with seasonal changes in skull size and brain mass. *J. Exp.*  
485 *Biol.* **221**, jeb166595.
- 486 Lázaro, J., Hertel, M., Muturi, M. and Dechmann, D.K.N. (2019). Seasonal reversible size changes in the  
487 braincase and mass of common shrews are flexibly modified by environmental conditions. *Sci. Rep.* **9**,  
488 2489.
- 489 Levin, S.A. (1998). Ecosystems and the biosphere as complex adaptive systems. *Ecosystems* **1**, 431–436.
- 490 Logan, J.M., Haas, H., Deegan, L.A. and Gaines, E.F. (2006). Turnover rates of nitrogen stable isotopes in  
491 the salt marsh mummichog, *Fundulus heteroclitus*, following a laboratory diet switch. *Oecologia* **147**,  
492 391–395.
- 493 MacNeil, M.A., Drouillard, K.G. and Fisk, A.T. (2006). Variable uptake and elimination of stable nitrogen  
494 isotopes between tissues in fish. *Can. J. Fish. Aquat. Sci.* **63**, 345–353.
- 495 Marchetti, M.P. and Nevitt, G.A. (2003). Effects of hatchery rearing on brain structures of rainbow trout,  
496 *Oncorhynchus mykiss*. *Environ. Biol. Fish.* **66**, 9–14.
- 497 Mayer, I., Meager, J., Skjaeraasen, J.E., Rodewald, P., Sverdrup, G. and Fernö, A. (2011). Domestication  
498 causes rapid changes in heart and brain morphology in Atlantic cod (*Gadus morhua*). *Environ. Biol.*  
499 *Fish.* **92**, 181–186.
- 500 McCallum, E.S., Capelle, P.M. and Balshine, S. (2014). Seasonal plasticity in telencephalon mass of a  
501 benthic fish. *J. Fish Biol.* **85**, 1785–1792.
- 502 McCann, K.S. and Rooney, N. (2009). The more food webs change, the more they stay the same. *Phil.*  
503 *Trans. R. Soc. B* **364**, 1789–1801.

- 504 Mink, J.W., Blumenschine, R.J. and Adams, D.B. (1981). Ratio of central nervous system to body  
505 metabolism in vertebrates: its constancy and functional basis. *Am. J. Physiol.* **241**, R203–R212.
- 506 Naya, D.E. and Bozinovic, F. (2006). The role of ecological interactions on the physiological flexibility of  
507 lizards. *Funct. Ecol.* **20**, 601–608.
- 508 Naya, D.E., Veloso, C., Sabat, P. and Bozinovic, F. (2009). The effect of short- and long-term fasting on  
509 digestive and metabolic flexibility in the Andean toad, *Bufo spinulosus*. *J. Exp. Biol.* **212**, 2167–2175.
- 510 Naylor, R., Hindar, K., Fleming, I.A., Goldberg, R., Williams, S., Volpe, J., Whoriskey, F., Eagle, J., Kelso, D.  
511 and Mangel, M. (2005). Fugitive salmon: Assessing the risks of escaped fish from net-pen  
512 aquaculture. *Bioscience* **55**, 427–437.
- 513 Nottebohm, F. (1981). A brain for all seasons: cyclical anatomical changes in song-control nuclei of the  
514 canary brain. *Science* **214**, 1368–1370.
- 515 Nyboer, E.A. and Chapman, L.J. (2018). Cardiac plasticity influences aerobic performance and thermal  
516 tolerance in a tropical, freshwater fish at elevated temperatures. *J. Exp. Biol.* **221**, 1–14.
- 517 Park, P.J., Chase, I. and Bell, M.A. (2012). Phenotypic plasticity of the threespine stickleback  
518 *Gasterosteus aculeatus* telencephalon in response to experience in captivity. *Curr. Zool.* **58**, 189–210.
- 519 Patterson, K. and Blanchfield, P.J. (2013). *Oncorhynchus mykiss* escaped from commercial freshwater  
520 aquaculture pens in Lake Huron, Canada. *Aquacult. Environ. Interact.* **4**, 53–65.
- 521 Person-Le Ruyet, J., Le Bayon, N. and Gros, S. (2007). How to assess fin damage in rainbow trout,  
522 *Oncorhynchus mykiss*? *Aquat. Living Resour.* **20**, 191–195.
- 523 Petersson, E., Karlsson, L., Ragnarsson, B., Bryntesson, M., Berglund, A., Stridsman, S. and Jonsson, S.  
524 (2013). Fin erosion and injuries in relation to adult recapture rates in cultured smolts of Atlantic  
525 salmon and brown trout. *Can. J. Fish. Aquat. Sci.* **70**, 915–921.
- 526 Piersma, T. and Lindström, Å. (1997). Rapid reversible changes in organ size as a component of adaptive  
527 behavior. *Trends Ecol. Evol.* **12**, 134–138.
- 528 Piersma, T., Koolhaas, A. and Dekinga, A. (1993). Interactions between stomach structure and diet  
529 choice in shorebirds. *Auk* **110**, 552–564.
- 530 Poppe, T.T., Johansen, R., Gunnes, G. and Tørud, B. (2003). Heart morphology in wild and farmed  
531 Atlantic salmon *Salmo salar* and rainbow trout *Oncorhynchus mykiss*. *Dis. Aquat. Org.* **57**, 103–108.
- 532 Reid, D.M., Anderson, D.M. and Henderson, B.A. (2001). Restoration of lake trout in Parry Sound, Lake  
533 Huron. *N. Am. J. Fish. Manage.* **21**, 156–169.
- 534 Rodríguez, F., López, J.C., Vargas, J.P., Gómez, Y., Broglio, C. and Salas, C. (2002). Conservation of spatial  
535 memory function in the pallial forebrain of reptiles and ray-finned fishes. *J. Neurosci.* **22**, 2894–2903.
- 536 Schindelin, J., Arganda-Carreras, I., Frise, E., Kaynig, V., Longair, M., Pietzsch, T., Priebe, S., Rueden,  
537 C., Saalfeld, S., Schmid, B., Tinevez, J.-Y., White, D.J., Hartenstein, V., Eliceiri, K., Tomancak, P. and  
538 Cardona, A. (2012). Fiji: an open-source platform for biological-image analysis. *Nat. Methods* **9**, 676–  
539 682.

- 540 Schindler, D.E., Armstrong, J.B. and Reed, T.E. (2015). The portfolio effect in ecology and evolution.  
541 *Front. Ecol. Environ.* **13**, 257–263.
- 542 Secor, S.M. (2008). Digestive physiology of the Burmese python: broad regulation of integrated  
543 performance. *J. Exp. Biol.* **211**, 3767–3774.
- 544 Simonot, D.L. and Farrell, A.P. (2007). Cardiac remodelling in rainbow trout *Oncorhynchus mykiss*  
545 Walbaum in response to phenylhydrazine-induced anaemia. *J. Exp. Biol.* **210**, 2574–2584.
- 546 Sol, D., Lefebvre, L. and Rodriguez-Teijeiro, J.D. (2005). Brain size, innovative propensity and migratory  
547 behaviour in temperate Palaearctic birds. *Proc. R. Soc. B* **272**, 1433–1441.
- 548 Sol, D., Bacher, S., Reader, S.M. and Lefebvre, L. (2008). Brain size predicts the success of mammal  
549 species introduced into novel environments. *Am. Nat.* **172**, S63–S71.
- 550 Thompson, J.N. (1998). Rapid evolution as an ecological process. *Trends Ecol. Evol.* **13**, 329–332.
- 551 Tramontin, A.D. and Brenowitz, E.A. (2000). Seasonal plasticity in the adult brain. *Trends Neurosci.* **23**,  
552 251–258.
- 553 Trumpickas, J., Pinder, M. and Dunlop, E.S. (2020) Effects of vessel size and trawling on estimates of  
554 pelagic fish backscatter in Lake Huron. *Fish. Res.* **224**, 105430.
- 555 Turcotte, M.M. and Reznick, D.N. and Hare, J.D. (2011). The impact of rapid evolution on population  
556 dynamics in the wild: experimental test of eco-evolutionary dynamics. *Ecol. Lett.* **14**, 1084–1092.
- 557 Turschwell, M.P. and White, C.R. (2016). The effects of laboratory housing and spatial enrichment on  
558 brain size and metabolic rate in the eastern mosquitofish, *Gambusia holbrooki*. *Biol. Open* **5**, 205–  
559 210.
- 560 Vander Zanden, M.J. and Rasmussen, J.B. (1999). Primary consumer  $\delta^{13}\text{C}$  and  $\delta^{15}\text{N}$  and the trophic  
561 position of aquatic consumers. *Ecology* **80**, 1395–1404.
- 562 White, G.E. and Brown, C. (2015). Variation in brain morphology of intertidal gobies: a comparison of  
563 methodologies used to quantitatively assess brain volumes in fish. *Brain Behav. Evol.* **85**, 245–256.
- 564 Yaskin, V.A. (2011). Seasonal changes in hippocampus size and spatial behavior in mammals and birds.  
565 *Biol. Bull. Rev.* **1**, 279.
- 566 Yoshida, T., Jones, L.E., Ellner, S.P., Fussmann, G.F. and Hairston, N.G. (2003). Rapid evolution drives  
567 ecological dynamics in a predator–prey system. *Nature* **424**, 303–306.
- 568 Zupanc, G.K.H. and Horschke, I. (1995). Proliferation zones in the brain of adult gymnotiform fish: A  
569 quantitative mapping study. *J. Comp. Neurol.* **353**, 213–233.
- 570



571 **Figures**

572

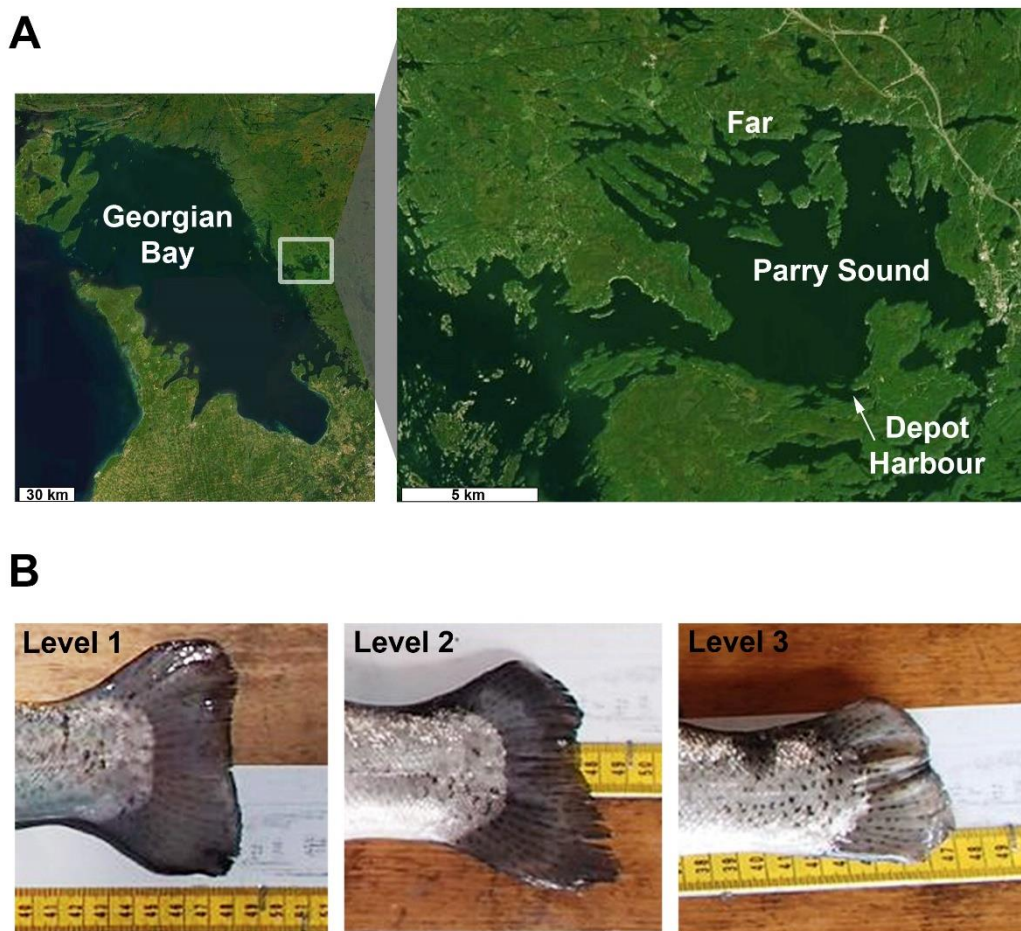

573

574

575 **Figure 1:** Sampling site and fin erosion of the rainbow trout of Parry Sound, Ontario. A) Parry Sound is a  
576 body of water connected to Lake Huron's Georgian Bay by a channel creating a natural barrier to fish  
577 movements. Captive trout were taken from the commercial floating pen culture operation located in  
578 Depot Harbour in southern Parry Sound (arrow). Escaped trout were sampled both near Depot Harbour  
579 and far away from the pen culture operation in northern Parry Sound (Far). Maps source: Esri World  
580 Imagery, Nov. 19, 2020 ([www.arcgis.com](http://www.arcgis.com)). Maps generated using R (v. 4.0.3). B) Examples of the three  
581 levels of caudal fin erosion in rainbow trout of Parry Sound: level 1 (little to no erosion), level 2  
582 (intermediate) and level 3 (advanced). Little erosion was seen in wild lake trout of Parry Sound while the  
583 high incidence of fin erosion in captive fish housed at high density in pens carried over to the escaped  
584 rainbow trout sampled in Parry Sound.

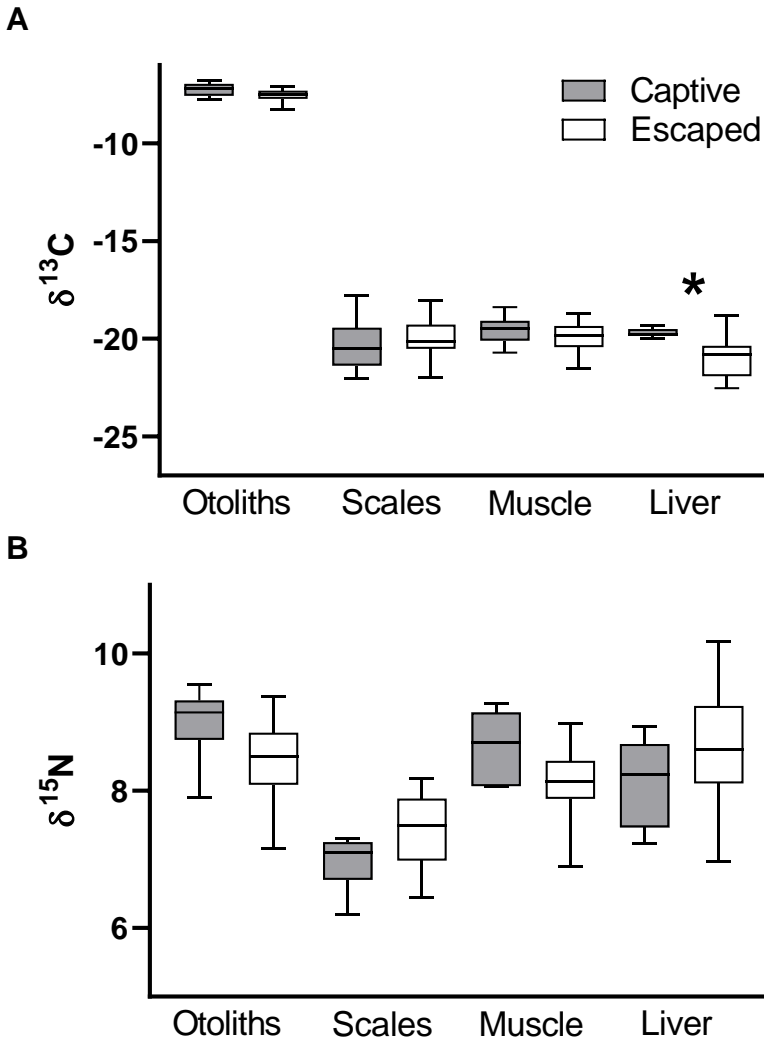

585

586 **Figure 2:** Comparison of stable isotope signatures in four tissues of captive and escaped rainbow trout.  
587 A)  $\delta^{13}\text{C}$ , B)  $\delta^{15}\text{N}$ . For each tissue and isotope, values for captive trout (gray bars) are  
588 compared to values for escaped trout (white bars). Boxes are medians and 25<sup>th</sup> to 75<sup>th</sup> percentiles, while  
589 whiskers are minimal and maximal values. The asterisk above liver values in panel A indicates a  
590 statistically significant Sidak's multiple comparison test. Sample sizes for each tissue are 6 (captive) and  
591 26 (escaped) trout sampled in 2019, except for scales of escaped trout (n=24).

592

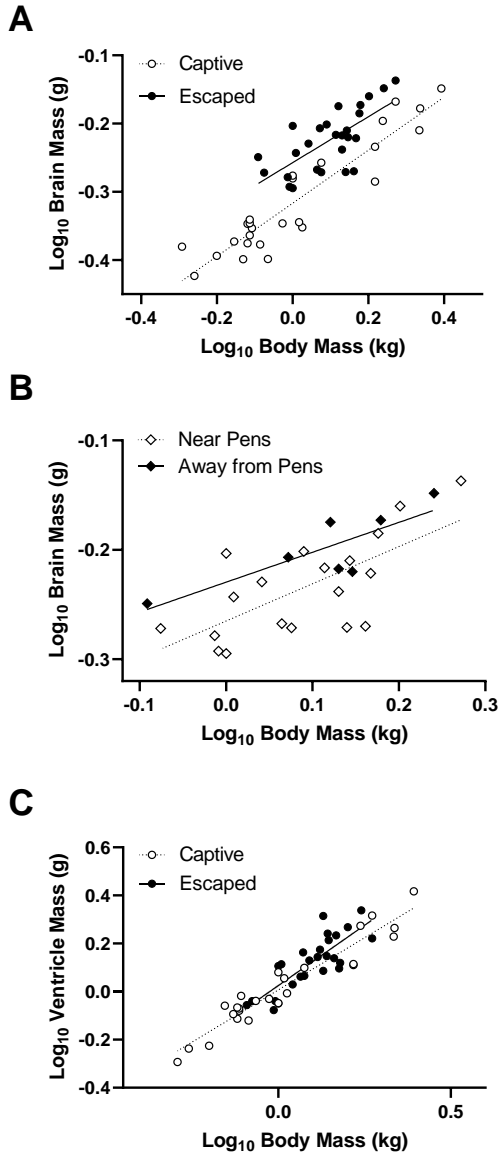

593

594 **Figure 3:** Effect of escape from a pen culture operation on brain size in rainbow trout. A) Body-brain  
595 mass relationships of captive trout sampled directly from growing pens (white symbols and dotted line)  
596 and escaped trout (black symbols and line). B) Body-brain mass relationships of escaped trout sampled  
597 in the vicinity of growing pens (white diamonds and dotted line) and escaped trout sampled far away  
598 from the pens (black diamonds and line). Relative brain size of escaped trout is larger than captive trout  
599 and larger in escaped trout captured farther away from the pen culture operation. C) Body-heart  
600 ventricle mass relationships of captive trout (white symbols and dotted line) and escaped trout (black  
601 symbols and line). There is no difference in relative heart ventricle size between captive and escaped  
602 trout. Linear regression was used to illustrate the relationships. Sample sizes are 26 captive (sampled in  
603 2015: 9, 2016: 6, 2017: 5, 2019: 6) and 26 escaped trout (sampled in 2019) in panels A and C, and 19  
604 near pens and 7 away from pens in panel B.

605

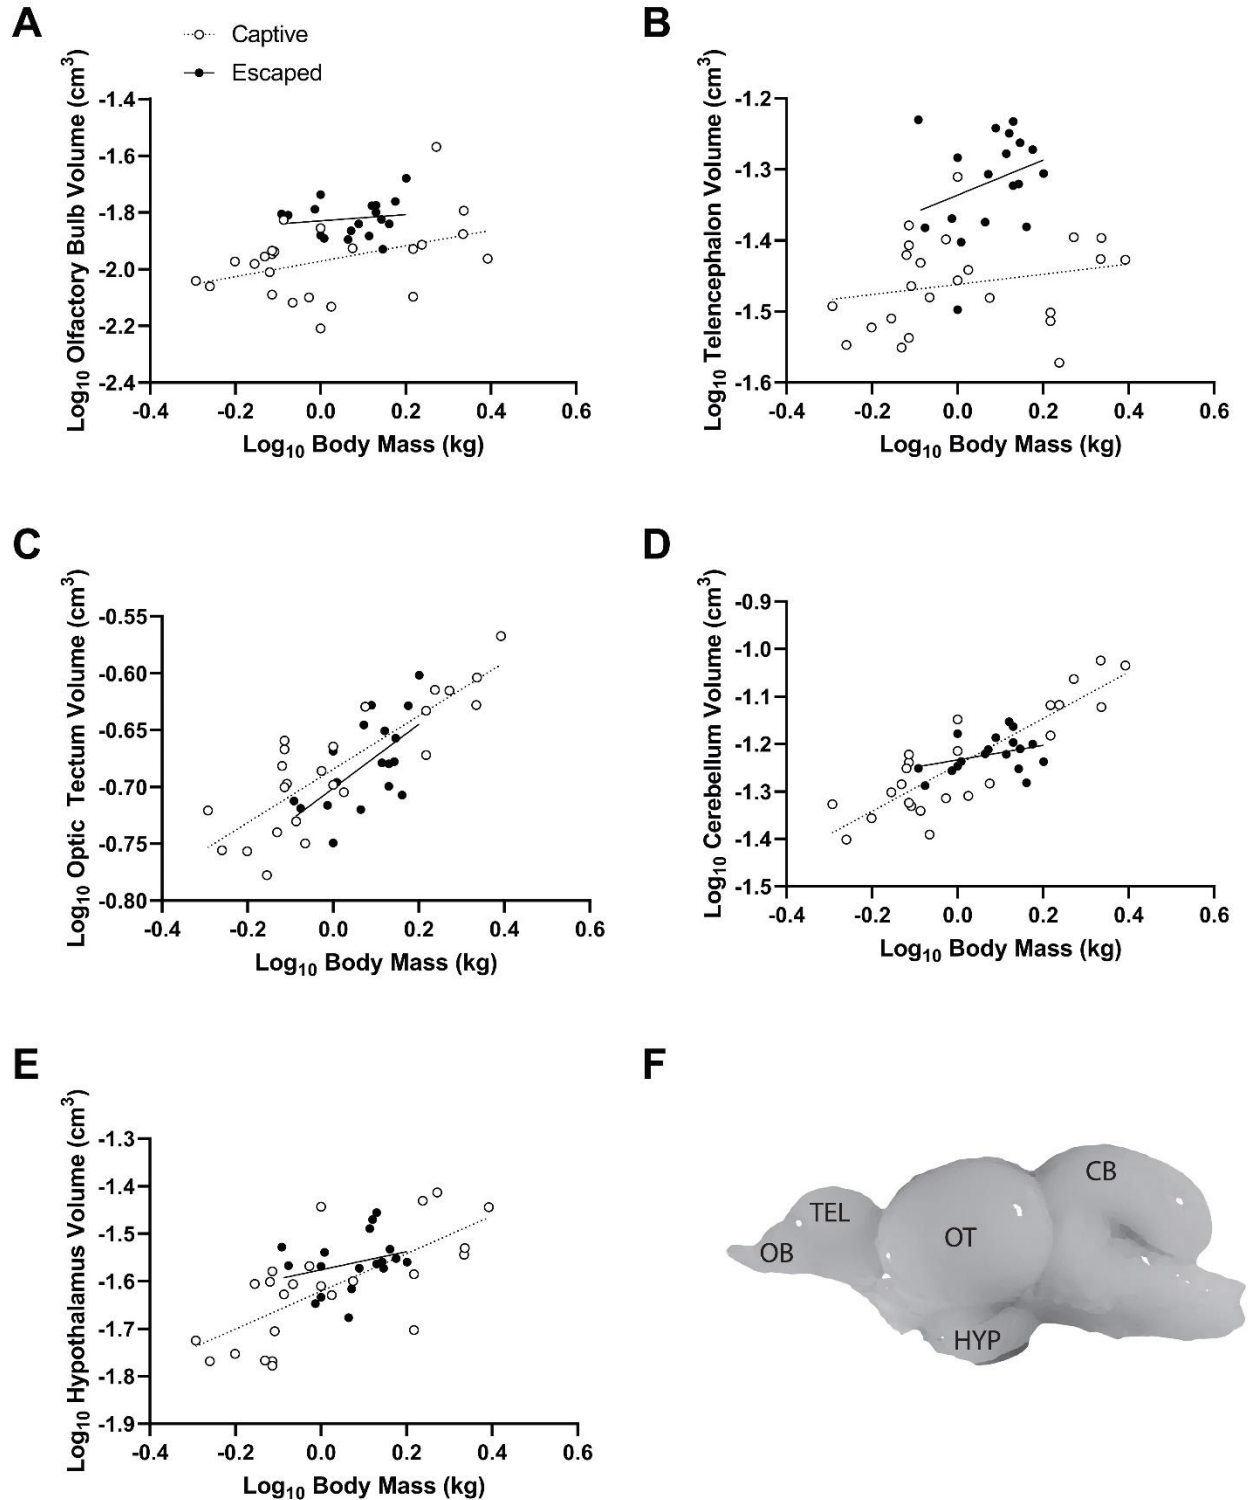

606

607 **Figure 4:** Effect of escape from a pen culture operation on brain region sizes in rainbow trout. Body-  
608 brain region volume relationships of captive trout sampled directly from growing pens (white symbols  
609 and dotted line) and escaped trout (black symbols and line). A) Olfactory bulb. B) Telencephalon. C)  
610 Optic tectum. D) Cerebellum. E) Hypothalamus. F) Lateral view of a rainbow trout brain illustrating the  
611 location of the five brain regions analyzed. Relative size of the olfactory bulbs and telencephalon is

612 larger in escaped trout. Sample sizes are 24 captive and 18 escaped trout for all brain regions.  
613 Abbreviations: CB: cerebellum, HYP: hypothalamus, OB: olfactory bulb, OT: optic tectum, TEL:  
614 telencephalon.

615 **Supporting Information Appendix**

616 Supplementary figures

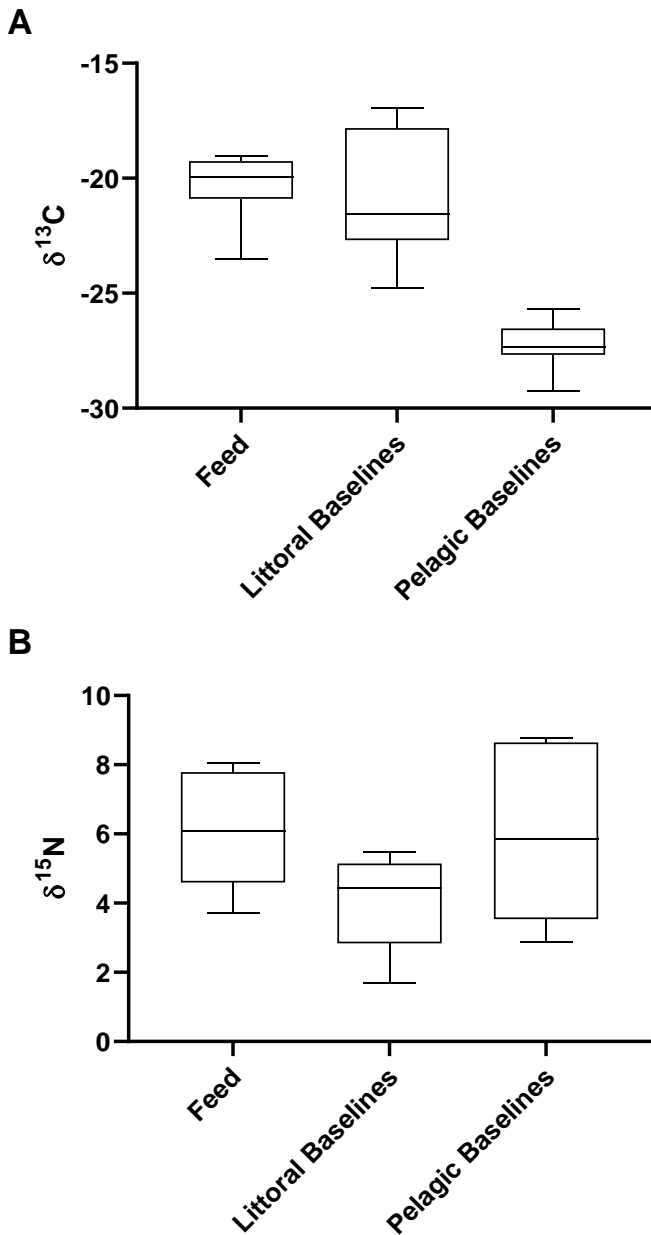

617

618 **Figure S1:** Comparison of stable isotope signatures of Parry Sound baseline organisms and commercial  
619 fish feed. A)  $\delta^{13}\text{C}$ , B)  $\delta^{15}\text{N}$ . Littoral baseline organisms were mayfly larvae (n=6) and snails  
620 (n=7), while pelagic baselines were zebra mussels (n=8). Feed was Skretting FW pellets 2.5-7.5 mm (n=5  
621 samples) obtained in summer 2018. Boxes are medians and 25<sup>th</sup> to 75<sup>th</sup> percentiles, while whiskers are  
622 minimal and maximal values.

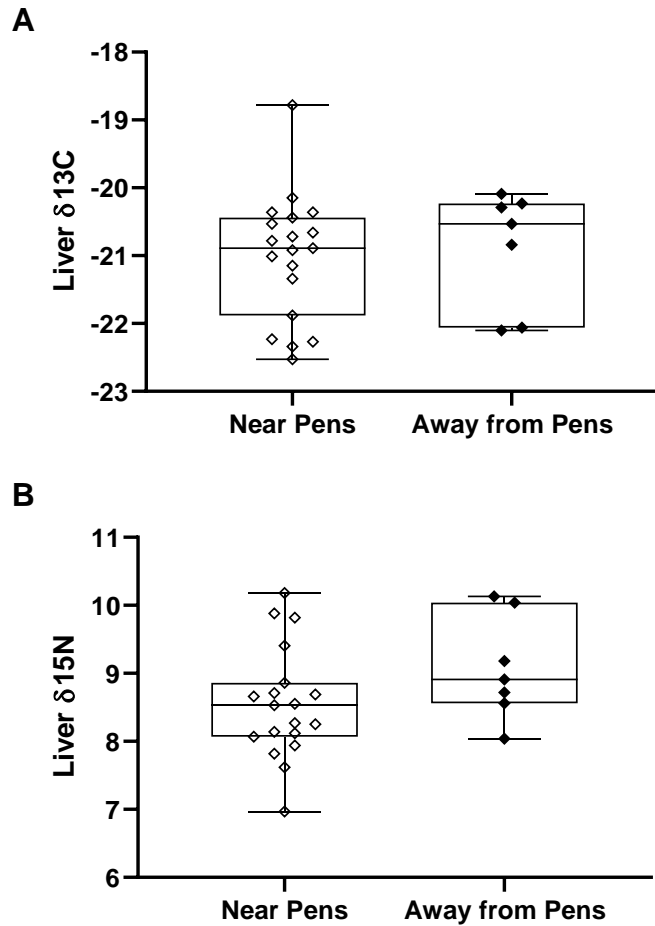

623

624 **Figure S2:** Liver stable isotope signatures and capture site of escaped trout. A)  $\delta^{13}\text{C}$ Carbon, B)  
625  $\delta^{15}\text{N}$ Nitrogen. Boxes are medians and 25<sup>th</sup> to 75<sup>th</sup> percentiles, while whiskers are minimal and maximal  
626 values. Unpaired t-tests showed no difference in liver  $\delta^{13}\text{C}$  ( $t_{24} = 0.35$ ,  $P = 0.73$ ) or  $\delta^{15}\text{N}$  ( $t_{24} = 1.5$ ,  $P =$   
627  $0.15$ ) by site of capture. Sample sizes are 19 (near pens) and 7 (away from pens) trout.

628

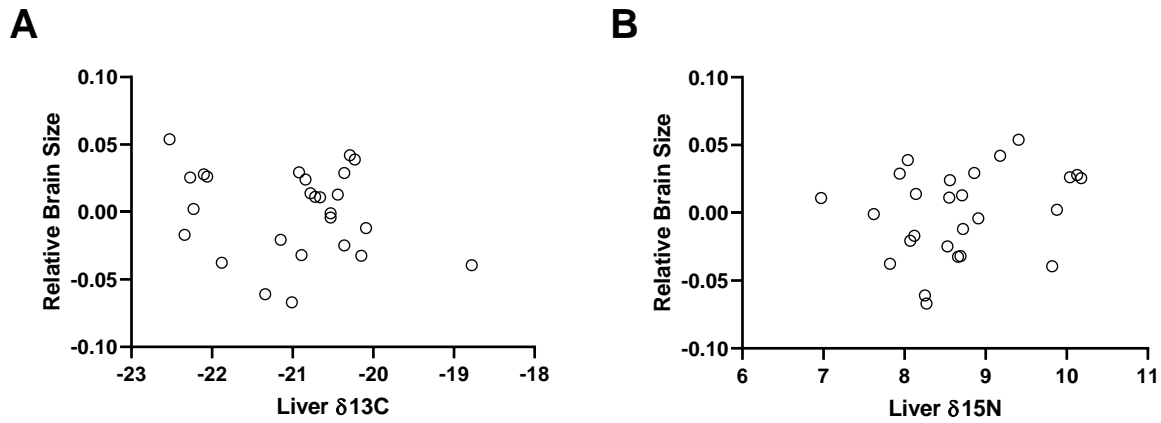

629

630 **Figure S3:** Absence of relationship between liver stable isotope signatures and brain size in escaped  
631 trout. Panels A ( $\delta^{13}\text{C}$ ) and B ( $\delta^{15}\text{N}$ ) show liver isotopic signatures in relation to relative brain  
632 size. Relative brain size is the residual values obtained from a linear regression of the logarithms of body  
633 mass and brain mass in escaped trout. Relationships between liver stable isotope signatures and brain  
634 size were assessed by linear regression: A:  $F_{(1,24)} = 0.98$ ,  $P = 0.33$ ; B:  $F_{(1,24)} = 1.78$ ,  $P = 0.2$ . Sample size is 26  
635 in both panels.

636
